# Supplementary material
Source: publisher site journal article supplement (https://www.dovepress.com/article/210872)
Supplement: Supplementary file 1 [file get_supplementary_file.php]

Supplement Table 1 Structured antibiotic use policy established in FAHZU

|  | **Nonrestricted** | **Restricted** | **Very-restricted** |
| --- | --- | --- | --- |
| **Penicillins** | Penicillin G | Sulbenicillin | Piperacillin/Sulbactam |
| Amoxicillin | Piperacillin/Tazobactam(8:1) | Sulbactam |
| Azlocillin |  | Piperacillin/Tazobactam(4:1) |
| Benzathine Benzylpenicillin |  |  |
| Amoxicillin / clavulanic acid |  |  |
|  |  |  |  |
| **Cephalosporins** | Cefazolin | Ceftriaxone | Cefepime |
| Cefradine | Cefotiam | Cefotaxime/Sulbactam |
| Cefaclor | Cefodizime |  |
| Cefuroxim | Ceftazidime |  |
| Ceftriaxone Sodium | Cefixime |  |
|  | Cefoperazone / Sulbactam |  |
|  |  |  |  |
| **Carbapenems** |  |  | Imipenem |
|  |  | Meropenem |
|  |  | Bisapenem |
|  |  | Apipenem |
|  |  |  |  |
| **Other beta-lactam antibiotics** |  | Cefminox | Aztreonam |
|  | Cefoxitin |  |
|  | Cephalosporin |  |
|  | Faropenem |  |
|  |  |  |  |
| **Aminoglycosides** | Isepamicin |  |  |
| Amikacin |  |  |
| Etimicin |  |  |
|  |  |  |  |
| **Macrolide** | Erythromycin |  |  |
| Azithromycin |  |  |
| Clarithromycin |  |  |
|  |  |  |  |
| **Tetracyclines** | Minocycline |  | Tigecycline |
|  |  |  |  |
| **Fluoroquinolones** | Ciprofloxacin | Moxifloxacin |  |
| Levofloxacin |  |  |
|  |  |  |  |
| **Sulfanilamide** | Sulfamethoxazole/trimethoprim |  |  |
|  |  |  |  |
| **Glycopeptides** |  |  | Vancomycin |
|  |  | Teicoplanin |
|  |  |  |  |
| **Lincosamides** | Clindamycin |  |  |
|  |  |  |  |
| **Nitroimidazole** | Metronidazole | Ornidazole |  |
|  | Levornidazole |  |
|  |  |  |  |
| **Others** | Fosfomycin | Rifampicin | Linezolid |

Non-restricted (first-line) antibiotics refer to those with proven efficacy, relatively low price and little effect on antibiotic resistance; Restricted antibiotics (second-line) refer to those with proven efficacy, relatively high price and greater effect on antibiotic resistance; Very-restricted antibiotics refer to those with known adverse effects and a tendency to cause antibiotic resistance. Clinicians should be trained and accredited before being assigned the level-of-use antibiotic prescribing or dispensing privileges.
